# Supplementary material for: Supramolecular gel-assisted synthesis of double shelled Co@CoO@N–C/C nanoparticles with synergistic electrocatalytic activity for the oxygen reduction reaction
Source: Royal Society of Chemistry journal article supplement (doi:10.1039/c5nr07929b), 2016-01-01
Supplement: c5nr07929b1.pdf [file c5nr07929b1.pdf]

Supporting Information

## Supramolecular Gel-Assisted Synthesis of Double Shelled Co@CoO@N-C/C Nanoparticles with Synergistic Electrocatalytic Activity for the Oxygen Reduction Reaction

Zexing Wu, Jie Wang, Lili Han, Ruoqian Lin, Hongfang Liu, Huolin L. Xin, and Deli Wang\*

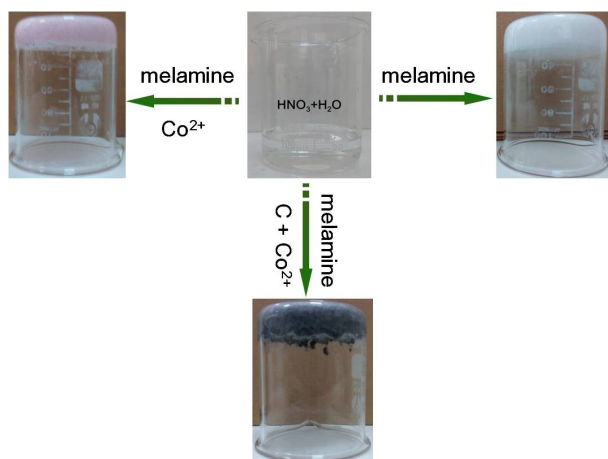

Fig. S1 Images of the supramolecular hydrogel.

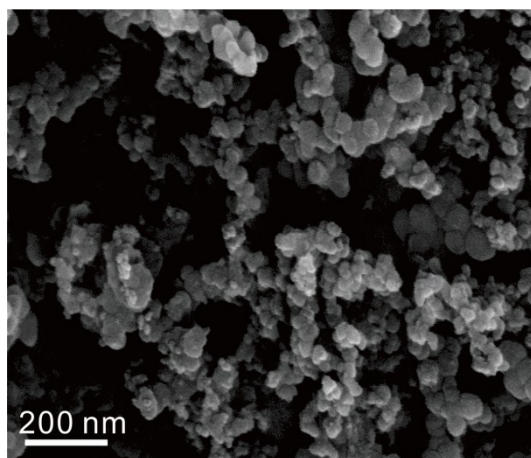

Fig. S2 FE-SEM image of Vulcan XC-72.

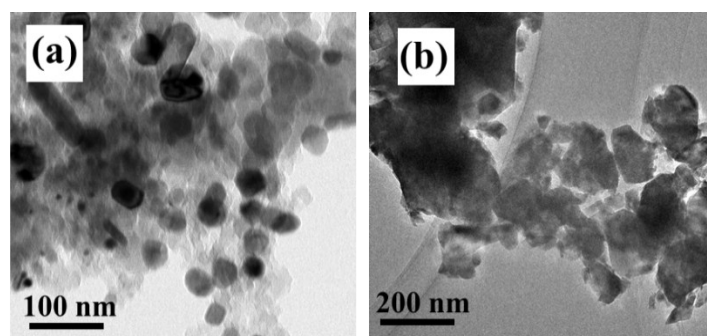

Fig. S3 TEM images of Co/CoO/C and M-Co/Co/CoO.

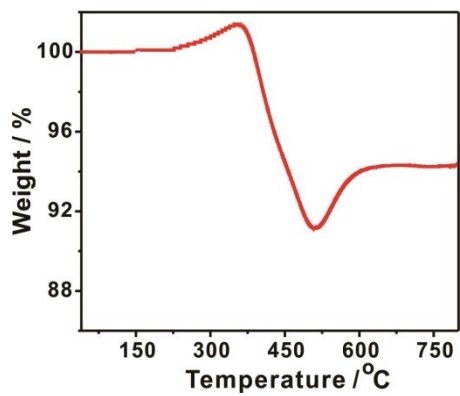

**Fig. S4** Thermo gravimetric analysis (TGA) of M-Co/CoO tested in flowing air at temperature ramp of 10 °C min<sup>-1</sup>.

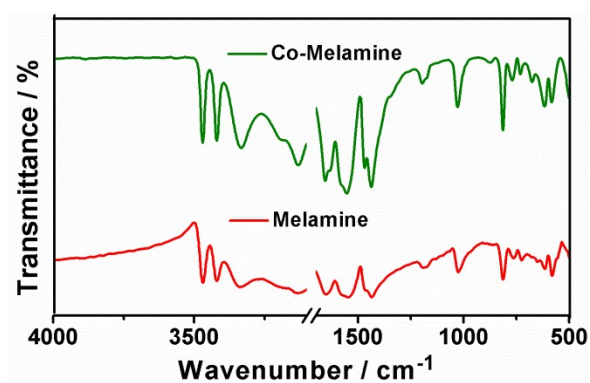

**Fig. S5** FT-IR spectra of melamine and Co-Melamine xerogel.

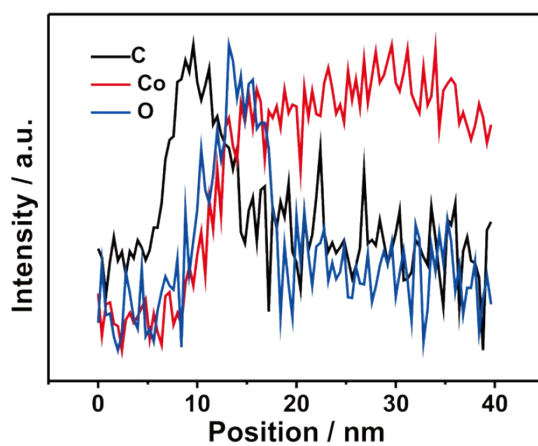

**Fig. S6** Line profile spectra of Co@CoO@N-C/C nanoparticle.

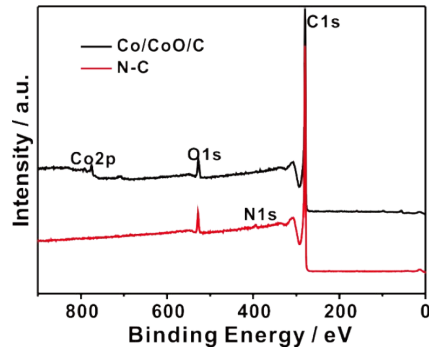

Fig. S7 Survey XPS spectra of N-C and Co/CoO/C.

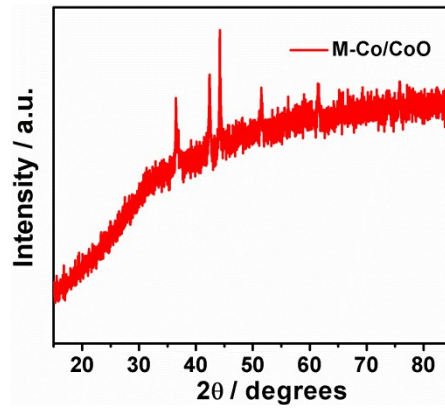

Fig. S8 XRD pattern of M-Co/CoO.

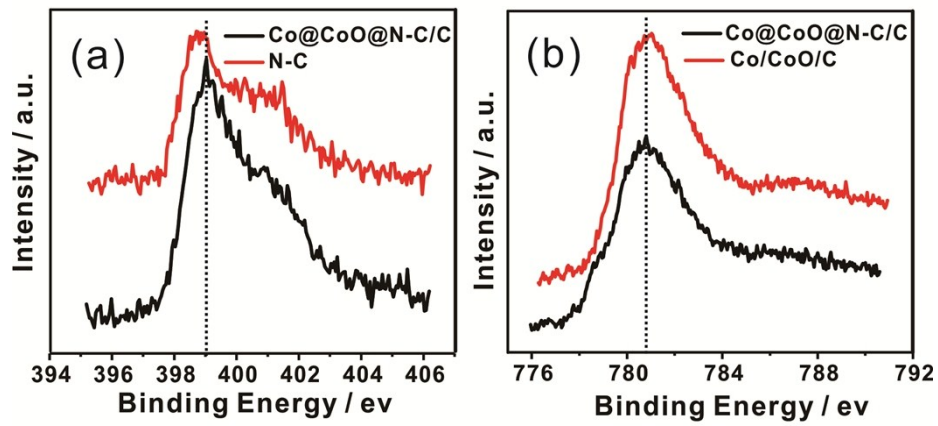

Fig. S9 (a) N 1s spectra of N-C and Co@CoO@N-C/C. (b) Co 2p spectrum of Co/CoO/C and Co@CoO@N-C/C.

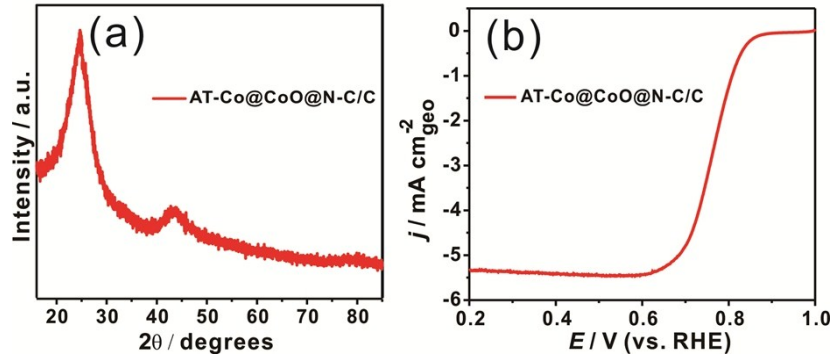

Fig. S10 (a), (b) XRD patterns and ORR polarization curve of AT-Co@CoO@N-C/C.

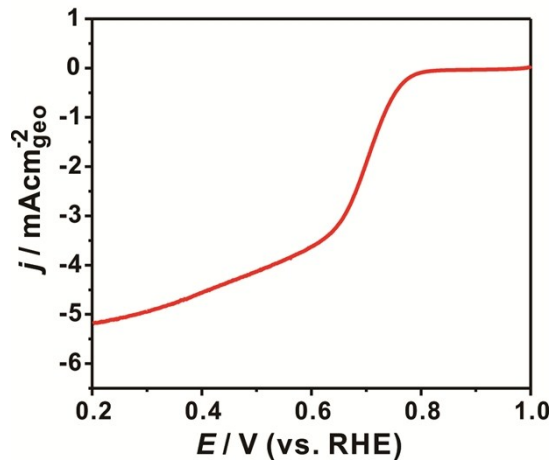

Fig. S11 ORR polarization curve of Vulcan XC-72.

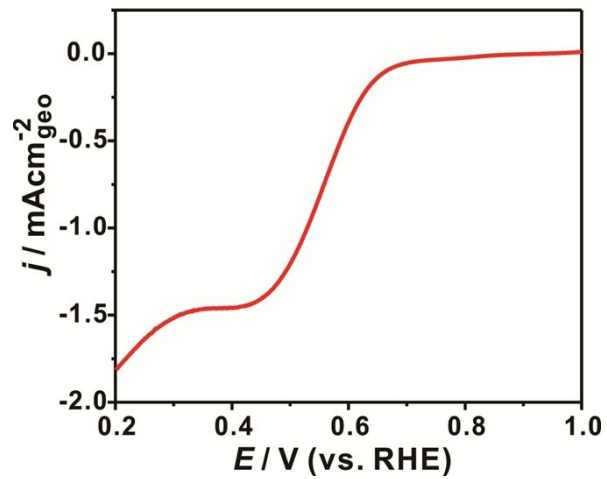

Fig. S12 ORR polarization curve of M-Co/CoO.

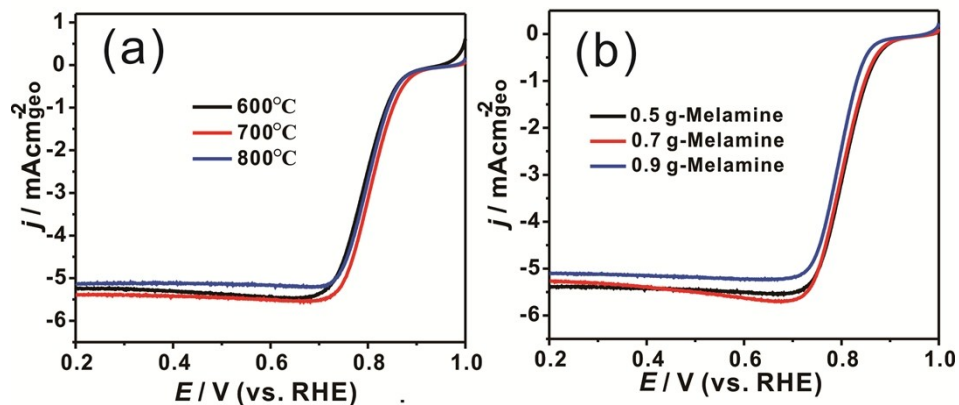

Fig. S13 (a) ORR polarization curves of Co@CoO@N-C/C after heat-treated at different temperature. (b) ORR polarization curves of different mass of melamine in N-C.

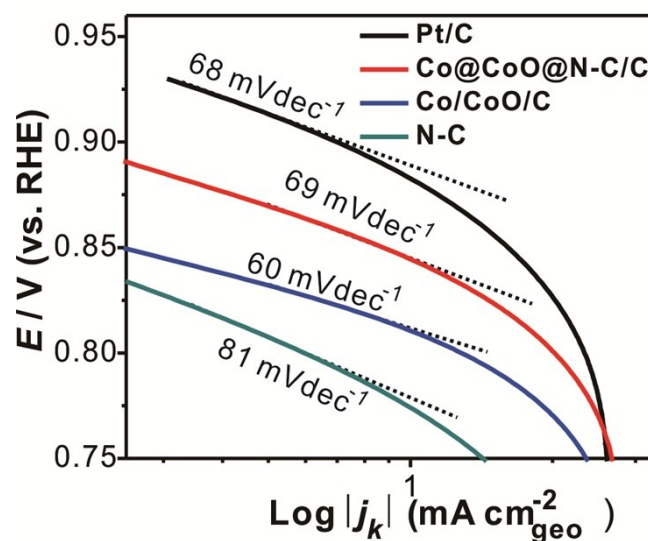

Fig. S14 Tafel plots of Pt/C, N-C, Co/CoO/C and Co@CoO@N-C/C in O<sub>2</sub>-saturated 0.1 M KOH electrolyte.

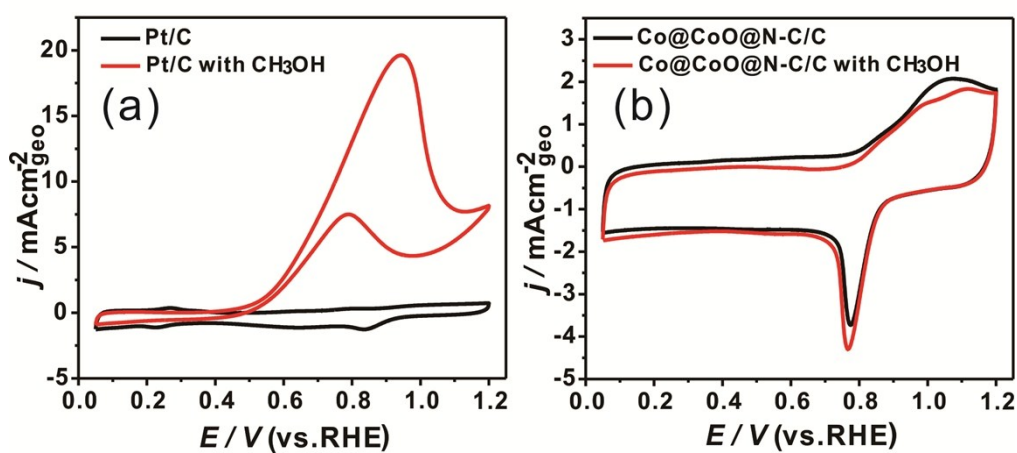

Fig. S15 CV curves of Pt/C (a) and Co@CoO@N-C/C (b) in O<sub>2</sub> saturated 0.1 M KOH electrolyte with or without 1 M methanol at a scan rate of 50 mVs<sup>-1</sup>.

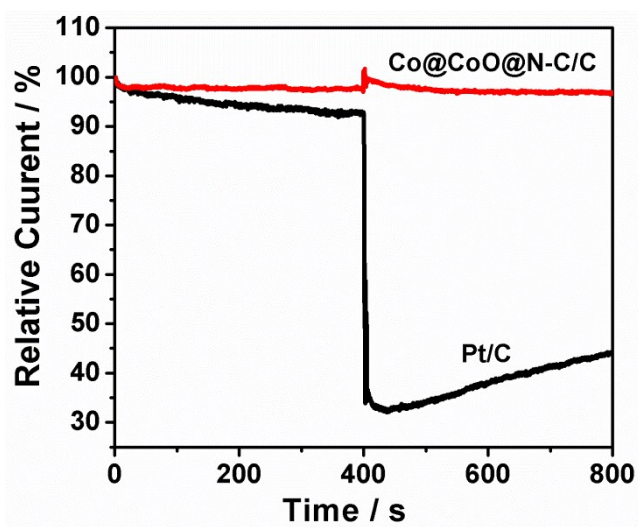

**Fig. S16** i-t chronoamperometric response of Pt/C and Co@CoO@N-C/C in 0.1 M KOH solution with introduction of 1 M methanol after about 400 s.

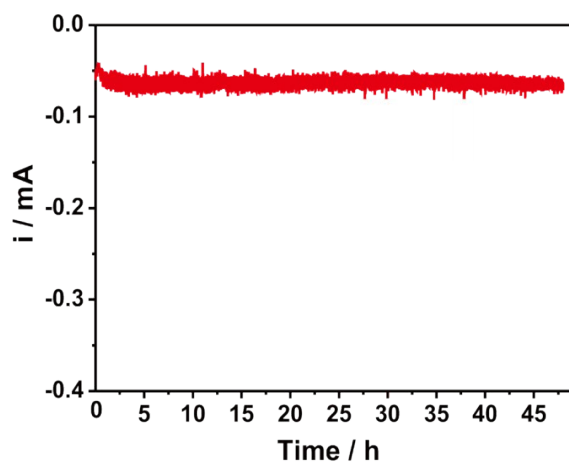

**Fig. S17** Long-term durability measurement of Co@CoO@N-C/C at a potential of 0.7 V in O<sub>2</sub>-saturated 0.1 M KOH solution.

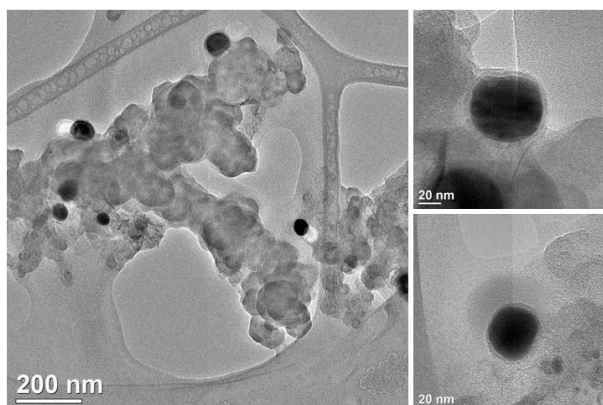

**Fig. S18** TEM images of Co@CoO@N-C/C after long-term durability measurement.



**Table S1** Comparison of the ORR performance of some cobalt based catalysts reported in literature.

| Catalysts                                  | ORR activity (V vs. RHE) <sup>a</sup> |                            |                                  | Ref.             |
|--------------------------------------------|---------------------------------------|----------------------------|----------------------------------|------------------|
|                                            | ORR peak <sup>b</sup>                 | Onset potential            | Half-wave potential <sup>c</sup> |                  |
| <b>Co@CoO@N-C/C</b>                        | <b>0.79</b>                           | <b>0.95</b>                | <b>0.81</b>                      | <b>This work</b> |
| N-CG-CoO#1 M KOH                           | 0.76                                  | 0.90                       | 0.79                             | [1]              |
| CoO/C                                      | -                                     | 0.83                       | 0.77                             | [2]              |
| NCO-A <sub>1</sub>                         | 0.7#5 mv s <sup>-1</sup>              | 0.93                       | 0.78                             | [3]              |
| CoO <sub>x</sub> /BP-N                     | -                                     | 0.86#10 mv s <sup>-1</sup> | 0.79                             | [4]              |
| Co/N-C                                     | 0.73                                  | 0.83#10 mv s <sup>-1</sup> | 0.74                             | [5]              |
| C@Co-P/C                                   | -                                     | 0.87                       | 0.80                             | [6]              |
| Co@Co <sub>3</sub> O <sub>4</sub> @C       | 0.79                                  | 0.93#10 mv s <sup>-1</sup> | 0.81                             | [7]              |
| Co/CoO/CoFe <sub>2</sub> O <sub>4</sub> /G | 0.7                                   | 0.77#10 mv s <sup>-1</sup> | 0.69                             | [8]              |
| Co <sub>2</sub> FeO <sub>4</sub> /MWCNT    | 0.7                                   | 0.91                       | 0.73                             | [9]              |
| Co <sub>3</sub> O <sub>4</sub> @N-C        | 0.80                                  | 0.95                       | 0.7                              | [10]             |
| Co/Co <sub>3</sub> O <sub>4</sub> /C-N     | -                                     | 0.95#20 mv s <sup>-1</sup> | 0.74                             | [11]             |
| NG/CNT/Co <sub>3</sub> O <sub>4</sub>      | -                                     | 0.9#10 mv s <sup>-1</sup>  | 0.71                             | [12]             |
| Co-N-CAs                                   | 0.79                                  | 0.84#10 mv s <sup>-1</sup> | 0.78                             | [13]             |
| Co-N-rGO                                   | 0.79                                  | 0.91#10 mv s <sup>-1</sup> | 0.77                             | [14]             |
| Co <sub>3</sub> O <sub>4</sub> /N-MG       | 0.82                                  | 0.93                       | 0.81                             | [15]             |

<sup>a</sup> Conversions of Hg/HgO electrode, Ag/AgCl electrode, and SCE into RHE scale were achieved by adopting the calibration results.

<sup>b</sup> ORR peak was obtained from cyclic voltammetry measured in O<sub>2</sub>-saturated 0.1 M KOH aqueous solution with a sweep rate of 50 mV s<sup>-1</sup> unless otherwise noted.

<sup>c</sup> Onset potential and Half-wave potential were obtained from linear sweep voltammetry performed on RDE in O<sub>2</sub>-saturated 0.1 M KOH solution with a rotation rate of 1600 rpm.

1. S. Mao, Z. Wen, T. Huang, Y. Hou and J. Chen, *Energy Environ. Sci.*, 2014, **7**, 609-616.
2. J. Liu, L. Jiang, B. Zhang, J. Jin, D. S. Su, S. Wang and G. Sun, *ACS Catal.*, 2014, **4**, 2998-3001.
3. M. Prabu, K. Ketpang and S. Shanmugam, *Nanoscale*, 2014, **6**, 3173-3181.
4. J. Liu, L. Jiang, Q. Tang, E. Wang, L. Qi, S. Wang and G. Sun, *Appl. Catal. B: Environ.*, 2014, **148-149**, 212-220.
5. Y. Su, Y. Zhu, H. Jiang, J. Shen, X. Yang, W. Zou, J. Chen and C. Li, *Nanoscale*, 2014, **6**, 15080-15089.
6. J. Ryu, N. Jung, D.-H. Lim, D. Y. Shin, S. H. Park, H. C. Ham, J. H. Jang, H.-J. Kim and S. J. Yoo, *Chem. Commun.*, 2014, **50**, 15940-15943.
7. W. Xia, R. Zou, L. An, D. Xia and S. Guo, *Energy Environ. Sci.*, 2015, **8**, 568-576.
8. R. Huo, W.-J. Jiang, S. Xu, F. Zhang and J.-S. Hu, *Nanoscale*, 2014, **6**, 203-206.
9. J. Wang, H. L. Xin, J. Zhu, S. Liu, Z. Wu and D. Wang, *J. Mater. Chem. A*, 2015, **3**, 1601-1608.
10. G. Zhang, C. Li, J. Liu, L. Zhou, R. Liu, X. Han, H. Huang, H. Hu, Y. Liu and Z. Kang, *J.*

*Mater. Chem. A*, 2014, **2**, 8184-8189..

11. Z.-Y. Wu, P. Chen, Q.-S. Wu, L.-F. Yang, Z. Pan and Q. Wang, *Nano Energy*, 2014, **8**, 118-125.

12. S. S. Li, H. P. Cong, P. Wang and S. H. Yu, *Nanoscale*, 2014, **6**, 7534-7541.

13. B. You, P. Yin and L. An, *Small*, 2014, **10**, 4352-4361.

14. B. Zheng, J. Wang, F.-B. Wang and X.-H. Xia, *J. Mater. Chem. A*, 2014, **2**, 9079-9084.

15. J. Xiao, X. Bian, L. Liao, S. Zhang, C. Ji and B. Liu, *ACS Appl. Mater. Inter.*, 2014, **6**, 17654-17660.
